# Supplementary material
Source: publisher figshare collection journal article supplement (https://acs.figshare.com/ndownloader/files/4015831)
Supplement: Supplementary file 1 [file 4015831]

**A Biphasic Micro-reactor for Efficient and Fast Membrane Protein Pretreatment with Combination of Formic Acid Assisted Solubilization, on-column pH adjustment, Reduction, Alkylation and Tryptic Digestion**

**Qun Zhao<sup>1,2</sup>, Yu Liang<sup>1</sup>, Huiming Yuan<sup>1</sup>, Zhigang Sui<sup>1</sup>, Qi Wu<sup>1,2</sup>, Zhen Liang<sup>1</sup>, Lihua Zhang<sup>\*1</sup>, Yukui Zhang<sup>1</sup>**

<sup>1</sup>National Chromatographic R. & A. Center, Key Laboratory of Separation Science for Analytical Chemistry, Dalian Institute of Chemical Physics, Chinese Academy of Science, Dalian 116023, China

<sup>2</sup>University of Chinese Academy of Sciences, Beijing 100039, China

\* To whom correspondence should be addressed. E-mail: lihuazhang@dicp.ac.cn.

Phone & fax: +86-411-84379720.

### **Preparation of membrane protein samples**

Five male Sprague-Dawley rats (180–200 g) were killed by decapitation, and the cerebellums were dissected quickly and freshly frozen in liquid nitrogen followed by storage at  $-80^{\circ}\text{C}$ . For IMP extraction, the procedure was followed the previously described method with minor modifications. Briefly, five rat cerebellums (about 1.4 g) were washed with cold PBS for 3 times, and further homogenized in 10 mL of high salt buffer (2 M NaCl, 1×PBS, pH 7.4 and 1% (v/v) protease inhibitor cocktail) using Tissue Tearor from Biospec Products (Bartlesville, OK) at approximately 20 000 rpm for 3 min, followed by ultrasonication (Cole-Parmer, Vernon Hills, IL) for 3 min on ice, at power 100% pulse duration to break cells and extract proteins. The resultant solution was centrifuged at 1 500 g for 10 min at  $4^{\circ}\text{C}$  to remove unbroken cells and debris. The supernatant was collected, and centrifuged at 38 000 g for 1 h at  $4^{\circ}\text{C}$  to collect membrane protein pellet. The pellet was re-extracted in 20 mL of high pH buffer (0.1 M  $\text{Na}_2\text{CO}_3$ , 1% (v/v) protease inhibitor, pH 11.3), and incubated on ice for 1 h to remove loosely associated peripheral membrane proteins, followed by centrifugation under the same conditions. Subsequently, the pellet was washed with 20 mL of urea buffer (4 M urea, 1×PBS, pH 7.4) to further enrich membrane proteins. After 10 min incubation on ice, the supernatant was discarded under the same centrifugation conditions. The pellet was suspended in 1.5 mL cold water and homogenized by Tissue Tearor, followed by protein quantification with Bradford assay kit (Bio-Rad, Hercules, CA) using BSA as a standard, which was further divided equally into several aliquots for analysis. Then, each aliquot of cell lysates was precipitated with methanol/chloroform to remove lipids. Finally, the pellet was lyophilized and stored at  $-80^{\circ}\text{C}$  before use.

### **Preparation of on-column monolithic frit**

Briefly, a fused silica capillary was washed by 1 M NaOH for 3 h, water for 30 min, 0.1 M HCl for 1 h, water for 30 min, and methanol for 30 min, respectively, followed by drying with  $\text{N}_2$ . Subsequently, the capillary was filled with 50%  $\gamma$ -MAPS (v/v in methanol), and kept at room temperature for 24 h. Then the capillary was washed with methanol and dried by nitrogen. The polymerization solution, composed of 30 wt%

PEGDA, 70 wt% propyl alcohol and 0.3 wt% AIBN, was purged with N<sub>2</sub> for 30 s, and filled into one end of the capillary about 5 cm long. After both ends of capillaries were sealed, the polymerization was performed at 50 °C for 24 h. Finally, the prepared monolithic frit was washed with methanol.

### **In-solution digestion**

For the control experiment, the in-solution digestion was performed for the mixture of BSA, Myo and Cyt C. Briefly, BSA, Myo and Cyt C were individually dissolved in 50 mM NH<sub>4</sub>HCO<sub>3</sub> buffer, followed by mixing with equal mass to a final protein concentration of 0.2 mg/mL. Then the sample was denatured at 90 °C for 20 min, reduced with 11 mM DTT at 56 °C for 1 h, and alkylated with 27 mM IAA at room temperature for 30 min in the dark. After that, the sample was digested with trypsin with enzyme / protein ratio as 1:30 (m/m) at 37 °C for 12 h. Finally, a final concentration of 1% (v/v) FA was added into the solution to terminate the reaction. The sample was stored at -20 °C before analysis.

Fifty nanograms of Membrane proteins (1 µg/mL, 50 µL) extracted from rat cerebellums dissolved in 1% (v/v) FA was denatured at 90 °C for 20 min, followed by dilution with 50 mM NH<sub>4</sub>HCO<sub>3</sub> to adjust the pH of sample buffer to about 8, reduction with 8 mM DTT at 56 °C for 2 h and alkylation with 20 mM IAA at room temperature for 40 min in the dark. The sample was then digested with trypsin with enzyme / protein ratio as 1:30 (m/m) at 37 °C for 12 h. Finally, a final concentration of 1% (v/v) formic acid was added into the solution to terminate the reaction. The sample was stored at -20 °C before analysis.

### **Nano-LC-ESI-MS/MS analysis**

Three kinds of buffer solvents were H<sub>2</sub>O with 2% ACN and 0.1% formic acid (A) , ACN with 2% H<sub>2</sub>O and 0.1% formic acid (B) and 1 000 mM CH<sub>3</sub>COONH<sub>4</sub>, pH 3 (C).

Nano-RPLC-ESI-MS/MS analysis was carried out to analyze the mixture of BSA, Myo, and Cyt C, and trace membrane proteins from rat cerebellum, respectively. For standard protein mixture, experiments were performed with an LTQ linear ion trap mass spectrometer equipped with a quaternary Surveyor pump and an ESI probe Ion Max Source with microspray kit, controlled by Xcalibur software version 2.0.7.

(Thermo Fisher, Waltham, MA), with the gradient of mobile phase for separation as followed: from 2% to 10% B in 5 min, to 35% B in 40 min, to 80% B in 5 min and kept at 80% B for 10 min. The analysis of 50 ng membrane protein sample extracted from rat cerebellum was performed on an LTQ Orbitrap Velos MS. Before peptide separation, 1 000 mM  $\text{CH}_3\text{COONH}_4$  was used to directly elute peptides from the membrane protein reactor onto a home-packed C18 capillary column (15 cm, 75  $\mu\text{m}$  i.d. / 375  $\mu\text{m}$  o.d.) packed with C18 silica particles (5 $\mu\text{m}$ , 100 Å), and the gradient of mobile phase for separation was set as follows: from 2% B to 10% in 5 min, to 35% B in 60 min, to 80% B in 5 min, and kept at 80% B for 10 min.

2D nano-SCX-RPLC-ESI-MS/MS analysis of membrane protein samples extracted from rat cerebellum was performed on an LTQ XL with 6-step salt elution, respectively with 30, 60, 100, 200, 300 and 1 000 mM  $\text{CH}_3\text{COONH}_4$  to elute peptides from the biphasic micro-reactor onto a C18 capillary column (15 cm, 75  $\mu\text{m}$  i.d. / 375  $\mu\text{m}$  o.d.). Each salt step lasted 60 min, including 30 min for salt elution and 30 min for C18-trap column online desalting, with the flow rate of 230 nL/min. For nano-RPLC, the gradient was as followed: from 2% to 10% B in 10 min, to 40% B in 120 min, to 80% B in 10 min and maintained at 80% B for 10 min, followed by re-equilibration of the column with 2% B for 30 min.

LTQ XL was operated at positive ion mode. The MS/MS spectra were acquired in the data dependent CID mode and the normalized collision energy was set at 35%. The mass spectrometer was set that one full MS scan was followed by nine MS/MS scans on the nine most intense ions. For LTQ-orbitrap Velos analysis, MS scans were acquired in the orbitrap analyzer with resolution of 60 000 ( $m/z$  400). Up to the 15 most intense ions with charge state  $\geq 2$  in each full MS scan were selected for sequencing and fragmented in the ion trap with normalized collision energy of 35%, activation  $Q$  of 0.25, activation time of 10 ms, and one microscan.

Table S-1 Transmembrane peptides identified by biphasic micro-reactor coupled with 2D LC-MS

| IPI         | TMDs | peptide sequence                         | number of amino acids belonging to the TMDs |
|-------------|------|------------------------------------------|---------------------------------------------|
| IPI00371146 | 1    | FLNGFLAGAVVGAAGAGLTALQ<br>FLQR           | 23                                          |
| IPI00190020 | 7    | LDEFGEQLSK                               | 2                                           |
| IPI00231746 | 1    | ILLGTAVESAWGDEQSAFR                      | 13                                          |
| IPI00231746 | 1    | TYIISILFK                                | 7                                           |
| IPI00361872 | 6    | LAIIFLPVFTFTAGNALK                       | 17                                          |
| IPI00231102 | 4    | CLVGAPFASLVATGLCFFGVALFC<br>GCGHEALTGTEK | 23                                          |
| IPI00188732 | 4    | DNPLNEGTDAAR                             | 1                                           |
| IPI00370637 | 1    | IALGLGIPASATVAYILYR                      | 18                                          |
| IPI00371518 | 3    | SLCLGPALIIHAAK                           | 12                                          |
| IPI00371518 | 3    | FVLVFPLMYHSLNGVR                         | 8                                           |
| IPI00231774 | 1    | LLGLTTILSATALGFLAHK                      | 17                                          |
| IPI00190772 | 2    | FIGAGAATVGVAGSGAGIGTVFG<br>SLIIGYAR      | 23                                          |
| IPI00764950 | 1    | LYSLLFR                                  | 3                                           |
| IPI00948403 | 2    | ETPFVPIGMAGFAAIVAYGLYK                   | 18                                          |
| IPI00948403 | 2    | MSIHLIHMR                                | 3                                           |
| IPI00786838 | 1    | ALVIAPLFGIAQGVYFIGIGER                   | 20                                          |
| IPI00230858 | 12   | EDKTLAVGMQFMLLR                          | 4                                           |
| IPI00207065 | 10   | VGLVSALPHLVMTHIVPIGGQIAD<br>FLR          | 23                                          |
| IPI00207065 | 10   | FFTSMPPVYAIIVANFCR                       | 13                                          |
| IPI00209908 | 2    | ILYMMDEINNPVLTVK                         | 3                                           |

|             |    |                                   |    |
|-------------|----|-----------------------------------|----|
| IPI00563013 | 1  | VFSIVIPFLYVGTLSK                  | 15 |
| IPI00364850 | 1  | TSLFTVSHVIIPLWFVHYYVK             | 20 |
| IPI00951626 | 3  | AVGVTIGCILGMFPLIFFGGGEED<br>EK    | 20 |
| IPI00200069 | 2  | QGIFQVVVSR                        | 4  |
| IPI00213618 | 7  | LDEFGEQLSK                        | 2  |
| IPI00365293 | 1  | LSIPAALALGSAALGAAFATGLFL<br>GK    | 23 |
| IPI00382312 | 1  | VAPPFVLFYLIYTWGNQEFAQSK           | 15 |
| IPI00209115 | 2  | IIMIGTLTALQWFIYDSVK               | 15 |
| IPI00230832 | 1  | FGVAEPR                           | 3  |
| IPI00230832 | 1  | VHIVGAFVVALGVAAAYK                | 17 |
| IPI00562259 | 2  | IIMIGTLTALQWFIYDSVK               | 15 |
| IPI00201849 | 12 | LSDDIGDFGEVR                      | 4  |
| IPI00199586 | 8  | VAPYALQLSLAILQMALPLASLA<br>GR     | 23 |
| IPI00324377 | 10 | MLQMLVLPLISSLVTGMAALDS<br>K       | 21 |
| IPI00324377 | 10 | YFSFPGELLMR                       | 1  |
| IPI00362563 | 8  | TLLLPVVLAIVAAIGR                  | 15 |
| IPI00363807 | 3  | LLWAYVAHLGVR                      | 11 |
| IPI00363807 | 3  | LVLEGAALGVQYHLYGFK                | 11 |
| IPI00231927 | 4  | AAYFGVYDTAK                       | 6  |
| IPI00231927 | 4  | GAWSNVLR                          | 7  |
| IPI00231927 | 4  | GMGGAFLVLVLYDEIKKYV               | 11 |
| IPI00231927 | 4  | GAWSNVLRGMGGAFLVLVLYDEI<br>KK     | 19 |
| IPI00231927 | 4  | YFAGNLASGGAAGATSLCFVYPL<br>DFARTR | 23 |

|             |    |                                   |    |
|-------------|----|-----------------------------------|----|
| IPI00231927 | 4  | GMGGAFVLVLYDEIK                   | 11 |
| IPI00231927 | 4  | GMGGAFVLVLYDEIKK                  | 11 |
| IPI00231927 | 4  | GLYQGFSVSVQGIIYR                  | 16 |
| IPI00231927 | 4  | YFAGNLASGGAAGATSLCFVYPL<br>DFAR   | 23 |
| IPI00231927 | 4  | AFFKGAWSNVLR                      | 11 |
| IPI00213663 | 9  | IIAIKDLEVVAR                      | 3  |
| IPI00213663 | 9  | LAAPIHPDVVMLIAFPGDILMR            | 2  |
| IPI00213663 | 9  | MLILPLIISSLITGLSGLDAK             | 18 |
| IPI00769139 | 1  | WGFIPLVLYLGFTTR                   | 13 |
| IPI00734667 | 1  | LINGGIAGLIGVTCVFPIDLAK            | 20 |
| IPI00190974 | 5  | HALLETALTR                        | 4  |
| IPI00190974 | 5  | FVPFPAVASANICNVVLMR               | 18 |
| IPI00190974 | 5  | VVLPMPILVLPPIVMSMLEK              | 18 |
| IPI00205177 | 4  | LSLATFLLGASVLALPLLTR              | 19 |
| IPI00734686 | 2  | ILYMMDEINNPVLTVK                  | 3  |
| IPI00231860 | 3  | YLFNFIAAMPLISLVNNFLK              | 19 |
| IPI00231860 | 3  | LVEHLHNFIFFR                      | 4  |
| IPI00200472 | 12 | AYFTSATMIIAIPITGVK                | 16 |
| IPI00200472 | 12 | VFSWLATLHGGNIK                    | 6  |
| IPI00208115 | 12 | AAPILFASAALALGSSLALK              | 19 |
| IPI00208115 | 12 | AAPILFASAALALGSSLALKLPET<br>R     | 19 |
| IPI00208117 | 9  | VALTIALFHVAGK                     | 12 |
| IPI00200466 | 2  | YFAGNLASGGAAGATSLCFVYPL<br>DFARTR | 23 |
| IPI00200466 | 2  | YFAGNLASGGAAGATSLCFVYPL<br>DFAR   | 23 |
| IPI00331878 | 13 | LLPMFIIVVPGMISR                   | 14 |

|             |    |                                         |    |
|-------------|----|-----------------------------------------|----|
| IPI00207766 | 4  | GAVSSLALFALMGTTVCSAFQHL<br>GWIKPGLGSGSR | 23 |
| IPI00207766 | 4  | VLYAYGYTGDPSK                           | 7  |
| IPI00207766 | 4  | IASGLGVAWIIGR                           | 12 |
| IPI00207766 | 4  | AHQNTLEVYPPFLFLT VGGVYH<br>PR           | 18 |
| IPI00200487 | 13 | ELTMLALHHIPLMLLTINPK                    | 16 |
| IPI00200487 | 13 | MPLYGVHLWLPK                            | 10 |
| IPI00200487 | 13 | AHVEAPIAGSMILAAILLK                     | 16 |
| IPI00476388 | 9  | DVNYGWLIR                               | 4  |
| IPI00189176 | 2  | AYITTALGGLCGLISSAYSITHNPA<br>DSPLEAVAR  | 22 |
| IPI00555227 | 4  | ALMIAASVLGLPAILLLLTVLPCI<br>R           | 23 |
| IPI00208365 | 5  | QVWLLFEYPESGPAR                         | 3  |
| IPI00211024 | 12 | AEDASGEAAAMLNNMR                        | 2  |
| IPI00193082 | 1  | NSLLGAVAGLGPLIFWYYVIK                   | 20 |
| IPI00361315 | 7  | AVGLAYILPAAYFWR                         | 14 |
| IPI00202111 | 1  | KYFNSYTLTGR                             | 4  |
| IPI00202111 | 1  | YFNSYTLTGR                              | 4  |
| IPI00202111 | 1  | AGPESDGQFQFTGIKKYFNSYTL<br>TGR          | 4  |
| IPI00209269 | 4  | VALGITTVLMTTINTHLR                      | 18 |
| IPI00201353 | 1  | VFIPSLFLSHVLALGLGIYIGK                  | 20 |
| IPI00201353 | 1  | KGGIFSAEFLKVFIPLSLFLSHVLA<br>LGLGIYIGK  | 23 |
| IPI00189554 | 3  | SIISVIHLVTAAR                           | 11 |
| IPI00372527 | 1  | ATDCGPSVGLAAGIPSLLATALLV<br>ALLFTLIQR   | 23 |



|             |    |                               |    |
|-------------|----|-------------------------------|----|
| IPI00205490 | 6  | STIQNPYVAALYK                 | 6  |
| IPI00210125 | 12 | VVPILLAAASLVGGGLVALR          | 19 |
| IPI00210125 | 12 | LISGIGIGGSLPIVFAYFSEFLSR      | 18 |
| IPI00870007 | 2  | VLGHVNNILISAVLPTAFR           | 18 |
| IPI00364777 | 1  | LVPFLVFVVVPFMEFLLPVVVK        | 20 |
| IPI00734731 | 15 | ADANTAALQAILYNR               | 1  |
| IPI00734731 | 15 | IIFYVTMTKPR                   | 4  |
| IPI00205413 | 3  | GMAAPIIGVTPMFAVCFGFGLG<br>K   | 23 |
| IPI00215410 | 2  | GLVGVGLFALAHAAFSAAQHR         | 20 |
| IPI00359110 | 2  | LGTGFGLGMVFSLTFFK             | 16 |
| IPI00214057 | 7  | YFSFPGELLMR                   | 10 |
| IPI00957468 | 1  | LGVIGFAGFVGLLFAR              | 15 |
| IPI00957468 | 1  | VEHFVQWGVDNYNYLQNAPPG<br>FYPR | 4  |

Figure S-1. Distribution of (A) TMDs of IMPs and (B) GRAVY of peptides identified from rat cerebellum (14  $\mu$ g) by biphasic micro-reactor coupled with 2D nano-LC-MS/MS.

**A**

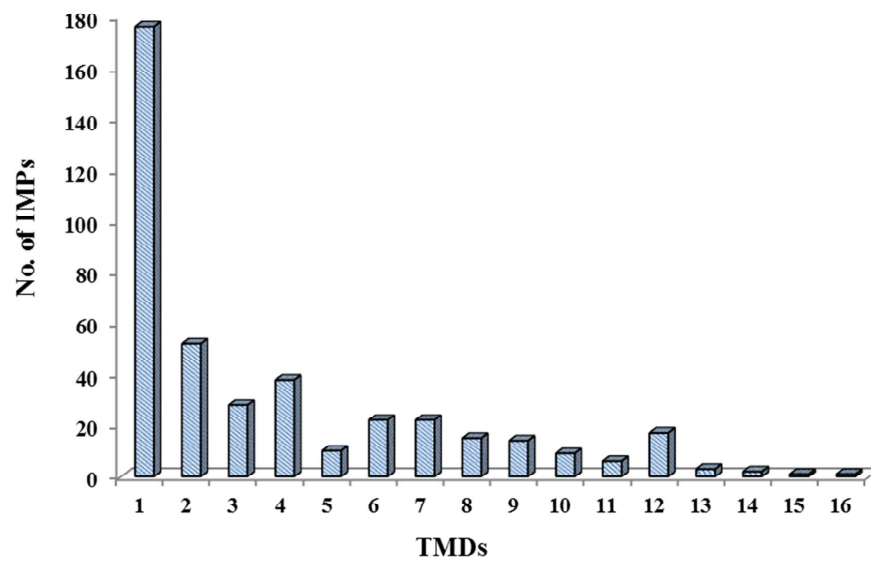

**B**

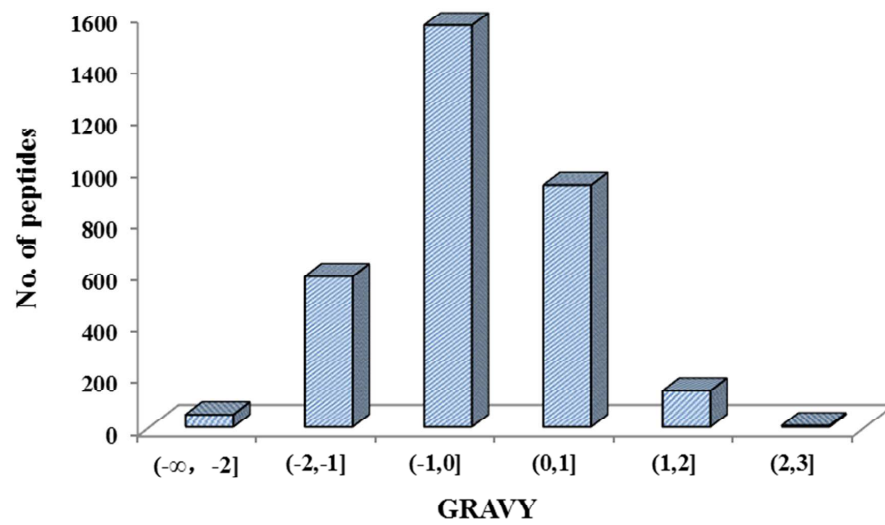

Figure S-1
